# Supplementary material for: High-Throughput Sequencing Discloses the Cucumber Mosaic Virus (CMV) Diversity in Slovakia and Reveals New Hosts of CMV from the Papaveraceae Family
Source: MDPI journal article supplement (doi:10.3390/plants11131665), 2022-06-23
Supplement: s1 [file s1]

Table S1. Analysis of obtained HTS data in relation to CMV

| isolate |      | total number of reads<br>/mean lenght | number of reads mapped to the determined CMV sequence | average depth of coverage |
|---------|------|---------------------------------------|-------------------------------------------------------|---------------------------|
| CP2     | RNA1 | 5690694/153.2                         | 300397                                                | 4012.7                    |
|         | RNA2 |                                       | 281196                                                | 5796.6                    |
|         | RNA3 |                                       | 850791                                                | 53496                     |
| CS3     | RNA1 | 5662550/144.6                         | 69741                                                 | 2292.2                    |
|         | RNA2 |                                       | 67140                                                 | 2561.7                    |
|         | RNA3 |                                       | 114354                                                | 62355.9                   |
| LAS     | RNA1 | 2302978/82.7                          | 135202                                                | 3117.2                    |
|         | RNA2 |                                       | 123599                                                | 3004.3                    |
|         | RNA3 |                                       | 215450                                                | 7632.1                    |
| MIH1    | RNA1 | 3732476/115.3                         | 10770                                                 | 279.1                     |
|         | RNA2 |                                       | 9041                                                  | 234.5                     |
|         | RNA3 |                                       | 19661                                                 | 937.8                     |
| MVU2-21 | RNA1 | 43583778/130.7                        | 2236858                                               | 82278                     |
|         | RNA2 |                                       | 2337838                                               | 94225                     |
|         | RNA3 |                                       | 7933097                                               | 434477                    |
| N65     | RNA1 | 5511704/143.3                         | 2997                                                  | 116.4                     |
|         | RNA2 |                                       | 2054                                                  | 99.8                      |
|         | RNA3 |                                       | 5089                                                  | 277.6                     |
| PK1     | RNA1 | 3770865/122.1                         | 16033                                                 | 4837                      |
|         | RNA2 |                                       | 12367                                                 | 3922.4                    |
|         | RNA3 |                                       | 19797                                                 | 8853.6                    |
| PK2     | RNA1 | 3901516/148.5                         | 275071                                                | 11309.8                   |
|         | RNA2 |                                       | 530240                                                | 20180.9                   |
|         | RNA3 |                                       | 638081                                                | 31380.8                   |
| SL50V   | RNA1 | 2550640/119.4                         | 36714                                                 | 1262                      |
|         | RNA2 |                                       | 30983                                                 | 1106.5                    |
|         | RNA3 |                                       | 76734                                                 | 4279.8                    |
| T1      | RNA1 | 1855568/115.3                         | 597167                                                | 19887.7                   |
|         | RNA2 |                                       | 511161                                                | 18570.9                   |
|         | RNA3 |                                       | 589683                                                | 3733.3                    |
| T24     | RNA1 | 2215328/116.7                         | 514614                                                | 15306.6                   |
|         | RNA2 |                                       | 313832                                                | 11865.1                   |
|         | RNA3 |                                       | 815834                                                | 44192.8                   |
| T50     | RNA1 | 2466092/117.0                         | 73536                                                 | 1993.6                    |
|         | RNA2 |                                       | 76587                                                 | 2443.1                    |
|         | RNA3 |                                       | 83607                                                 | 4552.9                    |
| T65     | RNA1 | 2886468/122.1                         | 54020                                                 | 5987.3                    |
|         | RNA2 |                                       | 36774                                                 | 3243.8                    |
|         | RNA3 |                                       | 63670                                                 | 7655.1                    |
| T101    | RNA1 | 3168840/176.4                         | 89645                                                 | 3176.9                    |
|         | RNA2 |                                       | 72750                                                 | 2936.9                    |
|         | RNA3 |                                       | 168866                                                | 10362.1                   |
